# Supplementary material for: Spatial Variations of Aquatic Bacterial Community Structure and Co-Occurrence Patterns in a Coal Mining Subsidence Lake
Source: MDPI journal article supplement (doi:10.3390/d14080674), 2022-08-18

## List of supplemental information

### 1. Statistical analyses

Firstly, the correlation matrix of ASV was (with relative abundance  $> 0.05\%$ ) calculated, and based on the correlation matrix, the UPGMA method was used for hierarchical clustering analysis. Next, the reliability of the clustering topology was evaluated using the bootstrap method. A random resampling of the ASV table was done, again calculated the correlation coefficient, did clustering and repeated the procedure 1000 times. Having thus obtained 1000 results of hierarchical clustering. The occurrence of clusters was estimated in the initial clustering among 1000 clustering results obtained from resamplings. And to identify clusters with high bootstrap support (which were found in 90% of 1000 clustering results). The visualization was a heat map with clustering using ggplot2 (heatmap.2) in R packages.

### 2. The code of network analysis

```
library(psych)

rm(list = ls())

otu <- read.csv("", header=T, row.names=1, comment.char="")

otu<-t(otu)

otu <- otu[,colSums(otu)/sum(otu)>=(0.05/100)]

otu<-log(data,10)

otu_tax <- read.csv("", header=T, row.names= 1, comment.char="")

design <- read.csv("", header=T, row.names= 1, )

otu_tax<-as.data.frame(otu_tax[colnames(otu),])
```

```
otu_abundance <- colSums(otu)

otu_pro <- cbind(otu_tax,otu_abundance)

occor = corr.test(otu,use="pairwise",method="spearman",adjust="fdr",alpha=0.05)

occor.r = occor$r

occor.p = occor$p

occor.r[occor.p>0.001|abs(occor.r)<0.9] = 0

write.csv(occor.r,file="")
```

**Table S1.** Estimates of richness and diversity for amplicon sequence variants (ASVs) for 12 water samples obtained from coal mining subsidence lakes and its connected rivers.

|           | <b>Samples</b> | <b>ASV</b> | <b>Chao 1</b> | <b>Shannon</b> | <b>Coverage</b> | <b>Reads</b> |
|-----------|----------------|------------|---------------|----------------|-----------------|--------------|
| <b>GM</b> | L1             | 2824       | 3514.62       | 7.389          | 0.978           | 63856        |
|           | L2             | 2945       | 3550.77       | 7.372          | 0.990           | 61963        |
|           | L3             | 2839       | 3423.15       | 7.265          | 0.979           | 85254        |
| <b>SL</b> | L4             | 2833       | 3511.10       | 7.451          | 0.979           | 64080        |
|           | L5             | 3294       | 3694.01       | 7.575          | 0.973           | 62381        |
|           | L6             | 2658       | 3232.85       | 7.284          | 0.981           | 67764        |
|           | L7             | 2755       | 3301.72       | 7.325          | 0.978           | 75772        |
|           | L8             | 2824       | 3523.36       | 7.318          | 0.981           | 59969        |
| <b>HR</b> | L9             | 1555       | 1815.74       | 7.082          | 0.990           | 94037        |
|           | L10            | 1807       | 2152.68       | 7.375          | 0.987           | 99111        |
|           | L11            | 979        | 1084.19       | 7.156          | 0.996           | 98755        |
|           | L12            | 1183       | 1398.63       | 6.303          | 0.993           | 105697       |

**Table S2.** Physical and chemical indices of water samples in different sites in coal mining subsidence lakes and its connected rivers.

|           | Samples | pH   | TDS<br>ppm | EC<br>us/cm | DO<br>mg/L | T<br>°C | SD<br>m | COD <sub>cr</sub><br>mg/L | TP<br>mg/L | TN<br>mg/L | NH <sub>4</sub> <sup>+</sup><br>mg/L | PO <sub>4</sub> <sup>3-</sup><br>mg/L | SO <sub>4</sub> <sup>2-</sup><br>mg/L | NO <sub>3</sub> <sup>-</sup><br>mg/L | F <sup>-</sup><br>mg/L | CL <sup>-</sup><br>mg/L | K <sup>+</sup><br>mg/L | Ca <sup>2+</sup><br>mg/L | Na <sup>+</sup><br>mg/L | Mg <sup>2+</sup><br>mg/L |
|-----------|---------|------|------------|-------------|------------|---------|---------|---------------------------|------------|------------|--------------------------------------|---------------------------------------|---------------------------------------|--------------------------------------|------------------------|-------------------------|------------------------|--------------------------|-------------------------|--------------------------|
| <b>GM</b> | L1      | 8.2  | 1004       | 2048        | 10.3       | 4.9     | 1       | 33                        | 0.268      | 2.42       | 0.21                                 | 0.08                                  | 136                                   | 4.88                                 | 0.356                  | 50.5                    | 7.28                   | 85.1                     | 243                     | 32.9                     |
|           | L2      | 8.08 | 1015       | 2046        | 10.7       | 5       | 0.9     | 50                        | 0.264      | 2.71       | 0.28                                 | 0.10                                  | 172                                   | 6.84                                 | 0.403                  | 65.2                    | 8.62                   | 106                      | 300                     | 40.1                     |
|           | L3      | 8.33 | 1048       | 2011        | 9.9        | 5.3     | 0.8     | 20                        | 0.126      | 2.4        | 0.19                                 | 0.06                                  | 136                                   | 5.66                                 | 0.402                  | 49.8                    | 7.04                   | 83.7                     | 239                     | 32.4                     |
| <b>SL</b> | L4      | 8.58 | 828        | 1648        | 10.1       | 5.9     | 1.9     | 12                        | 0.048      | 1.22       | 0.06                                 | 0.04                                  | 179                                   | 5.1                                  | 0.656                  | 71.8                    | 9.97                   | 113                      | 313                     | 40.6                     |
|           | L5      | 7.63 | 810        | 1582        | 11.1       | 4.8     | 1.34    | 19                        | 0.052      | 1.1        | 0.11                                 | 0.04                                  | 183                                   | 7.71                                 | 0.324                  | 69.3                    | 10                     | 112                      | 314                     | 41.1                     |
|           | L6      | 8.33 | 819        | 1639        | 11.8       | 5       | 1.64    | 12                        | 0.055      | 0.87       | 0.09                                 | 0.04                                  | 135                                   | 4.72                                 | 0.318                  | 50.2                    | 7.14                   | 84.4                     | 241                     | 32.7                     |
|           | L7      | 8.59 | 826        | 1652        | 10.5       | 4.8     | 1.2     | 11                        | 0.055      | 1.27       | 0.08                                 | 0.04                                  | 137                                   | 4.94                                 | 0.38                   | 50.8                    | 7.7                    | 83                       | 240                     | 32.4                     |
|           | L8      | 8.57 | 827        | 1651        | 11.3       | 5.1     | 1.5     | 12                        | 0.045      | 1.39       | 0.12                                 | 0.04                                  | 39.8                                  | 14.7                                 | 0.223                  | 42.9                    | 6.41                   | 76.2                     | 143                     | 21.6                     |
| <b>HR</b> | L9      | 8.62 | 1098       | 2193        | 10.6       | 5.9     | 1.08    | 20                        | 0.097      | 1.82       | 0.03                                 | 0.05                                  | 174                                   | 5.94                                 | 0.232                  | 66.7                    | 9.5                    | 112                      | 310                     | 40.0                     |
|           | L10     | 8.63 | 742        | 1482        | 10.5       | 6       | 1.56    | 13                        | 0.097      | 1.98       | 0.04                                 | 0.09                                  | 136                                   | 4.67                                 | 0.436                  | 49.3                    | 7.09                   | 82.8                     | 239                     | 32.6                     |
|           | L11     | 8.5  | 1103       | 2230        | 12.1       | 5.4     | 1.1     | 44                        | 0.097      | 2.29       | 0.13                                 | 0.05                                  | 158                                   | 6.77                                 | 0.345                  | 61.9                    | 7.62                   | 91.5                     | 304                     | 40.4                     |
|           | L12     | 8.69 | 1073       | 2146        | 12         | 6       | 1.37    | 26                        | 0.087      | 1.9        | 0.07                                 | 0.05                                  | 159                                   | 8.59                                 | 0.188                  | 62.1                    | 7.87                   | 88.7                     | 302                     | 39.7                     |

**Table S3.** Distribution of sulfur metabolism genes in each group of samples.

|           |     | Assimilatory sulfate reduction |       |                    |                   |       |       |       | Sulfate transport |       |       |       | Dissimilatory sulfate reduction and oxidation |      |                  | Sulfur oxidation   |      |                    |
|-----------|-----|--------------------------------|-------|--------------------|-------------------|-------|-------|-------|-------------------|-------|-------|-------|-----------------------------------------------|------|------------------|--------------------|------|--------------------|
|           |     | CysJ <sup>*</sup>              | cysI  | CysH <sup>**</sup> | Sir <sup>**</sup> | cysN  | cysD  | cysC  | cysA              | cysU  | cysW  | cysP  | aprA                                          | aprB | Sat <sup>*</sup> | sseA <sup>**</sup> | sorA | glpE <sup>**</sup> |
| <b>GM</b> | L1  | 204.4                          | 203.6 | 280.0              | 9.5               | 357.6 | 369.3 | 268.9 | 216.2             | 213.5 | 214.6 | 368.4 | 1.3                                           | 1.3  | 6.3              | 385.9              | 2.3  | 170.5              |
|           | L2  | 83.7                           | 159.1 | 534.7              | 348.1             | 152.2 | 273.7 | 317.4 | 375.0             | 371.1 | 371.1 | 421.9 | 1.1                                           | 1.1  | 290.7            | 548.5              | 13.2 | 4.7                |
|           | L3  | 204.2                          | 202.9 | 282.3              | 9.3               | 356.3 | 367.7 | 263.8 | 217.2             | 214.7 | 216.1 | 369.4 | 1.3                                           | 1.3  | 7.5              | 388.2              | 2.9  | 167.3              |
| <b>SL</b> | L4  | 213.3                          | 208.3 | 282.7              | 5.9               | 359.9 | 371.2 | 263.5 | 219.2             | 216.7 | 217.8 | 382.1 | 1.4                                           | 1.4  | 4.4              | 394.8              | 3.6  | 174.1              |
|           | L5  | 210.0                          | 204.7 | 272.3              | 7.4               | 356.8 | 367.1 | 266.4 | 212.6             | 210.5 | 211.7 | 369.5 | 1.4                                           | 1.4  | 4.4              | 379.6              | 2.5  | 170.6              |
|           | L6  | 213.1                          | 209.1 | 279.9              | 4.3               | 356.9 | 364.3 | 266.4 | 216.2             | 213.7 | 214.5 | 375.1 | 1.4                                           | 1.4  | 2.8              | 393.2              | 2.5  | 176.3              |
|           | L7  | 205.9                          | 201.2 | 274.6              | 7.4               | 354.6 | 365.2 | 261.6 | 212.9             | 210.6 | 211.9 | 366.7 | 1.6                                           | 1.6  | 3.9              | 381.6              | 2.4  | 170.2              |
|           | L8  | 212.8                          | 206.1 | 283.5              | 5.4               | 360.8 | 368.6 | 264.6 | 219.7             | 216.3 | 217.1 | 374.8 | 1.1                                           | 1.2  | 2.8              | 391.8              | 1.9  | 174.5              |
| <b>HR</b> | L9  | 162.4                          | 349.9 | 563.4              | 171.5             | 417.4 | 520.3 | 108.9 | 190.1             | 188.7 | 188.7 | 242.1 | 2.1                                           | 2.1  | 58.9             | 468.3              | 22.3 | 3.5                |
|           | L10 | 101.2                          | 175.0 | 577.7              | 380.7             | 145.6 | 230.6 | 376.5 | 522.6             | 450.4 | 450.4 | 506.3 | 1.3                                           | 1.3  | 361.4            | 662.2              | 10.6 | 14.1               |
|           | L11 | 131.9                          | 224.7 | 561.7              | 330.1             | 226.1 | 362.1 | 278.9 | 349.8             | 343.6 | 343.6 | 391.8 | 2.2                                           | 2.2  | 228.4            | 555.8              | 9.6  | 5.1                |
|           | L12 | 117.8                          | 192.1 | 558.8              | 351.5             | 211.3 | 332.5 | 295.3 | 353.5             | 343.8 | 343.8 | 389.1 | 1.2                                           | 1.2  | 251.9            | 554.6              | 8.5  | 5.4                |

**Table S4.** Topological properties of bacterial community co-occurrence networks and their Erdős-Rényi random networks in different habitats.

|               | Empirical network |               |              |            |       |      |    |       |      |          | Random network |       |      |
|---------------|-------------------|---------------|--------------|------------|-------|------|----|-------|------|----------|----------------|-------|------|
|               | N                 | E             |              | Modularity | avgCC | APL  | ND | AD    | GD   | $\sigma$ | Modularity     | avgCC | APL  |
|               |                   | Positive      | Negative     |            |       |      |    |       |      |          |                |       |      |
| <b>SL, GM</b> | 197               | 732 (59.43%)  | 500 (40.57%) | 9.93       | 0.51  | 3.05 | 6  | 12.88 | 0.07 | 3.4      | 0.21           | 0.10  | 2.02 |
| <b>HR</b>     | 205               | 1405 (66.45%) | 710 (33.55%) | 2.11       | 0.99  | 1    | 1  | 20.32 | 0.10 | 34.1     | 0.15           | 0.07  | 2.32 |

SL: Subsidence Lake; GM: Gangue Mountain; HR: Huihe River; N: Nodes; E: Edges; avgCC: Average clustering coefficient; APL: Average path length; ND: network diameter; AD: Average degree; GD: Graph density;  $\sigma$ : small-world coefficient.

$\sigma = (\text{avgCC}/\text{avgCC}_r)/(\text{APL}/\text{APL}_r)$  and  $\sigma > 1$  indicates “small-world” properties. Subscript  $r$  indicates the properties of the random network.

**Figure S1.** Rarefaction curves of richness across water samples in coal mining subsidence lakes and its connected rivers.

**Figure S2.** Spearman's correlations between concentration of each environmental factors and bacterial relative abundance at genus level. \*  $p < 0.05$ , \*\*  $p < 0.01$ , \*\*\*  $p < 0.001$ .

**Figure S3.** Cluster analysis of frequent ASVs (relative abundance  $> 0.05\%$ ) correlation in subsidence lake samples.

**Figure S4.** Cluster analysis of frequent ASVs (relative abundance  $> 0.05\%$ ) correlation in Huihe river samples.

Figure S1.

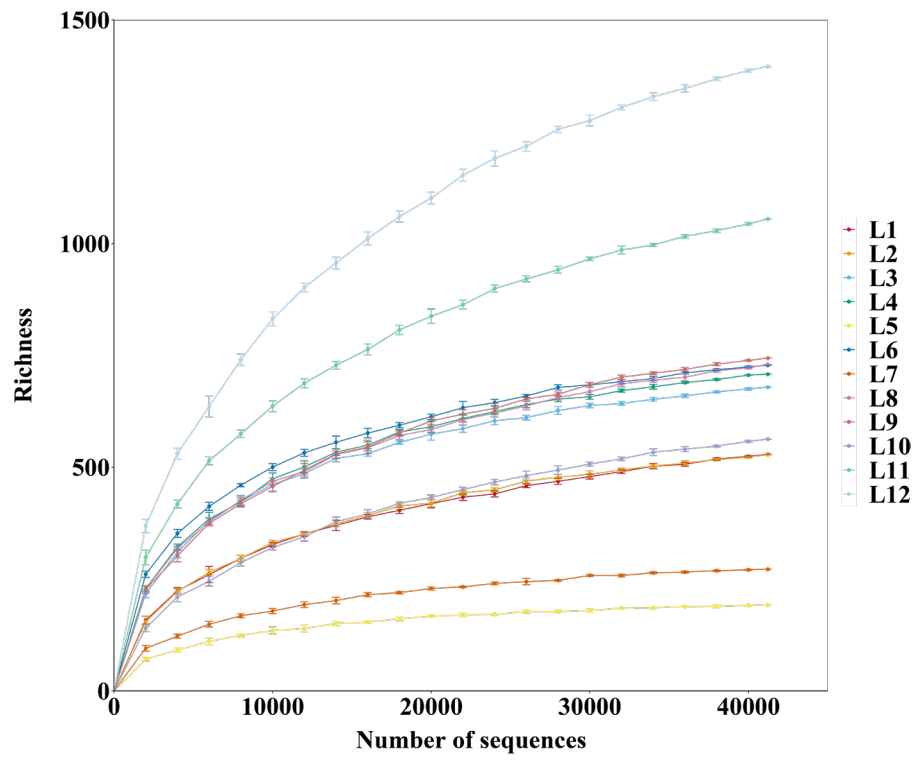



**Figure S2.**

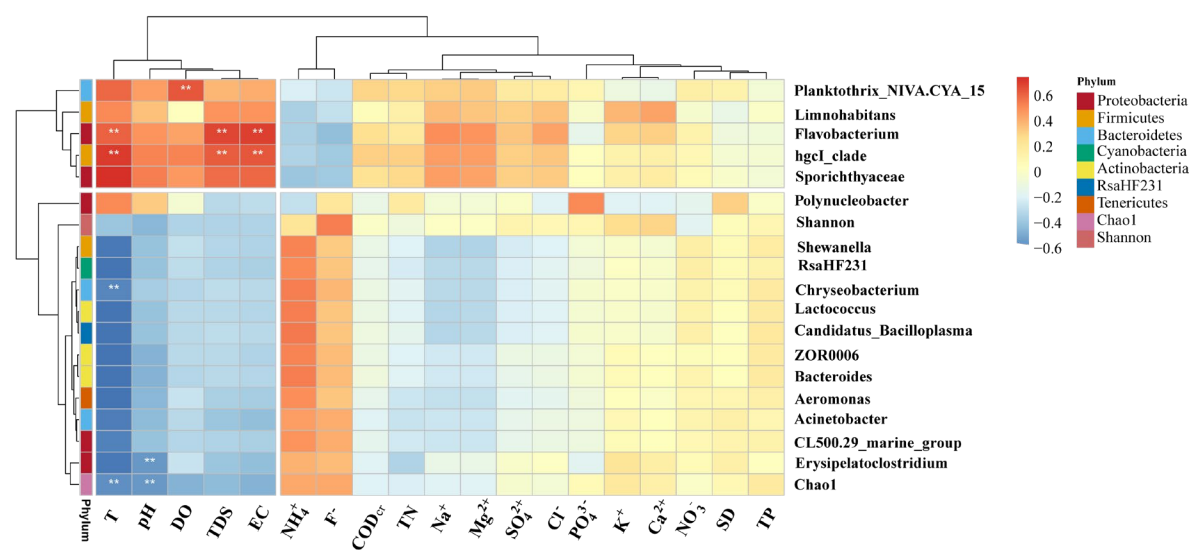

Figure S3.

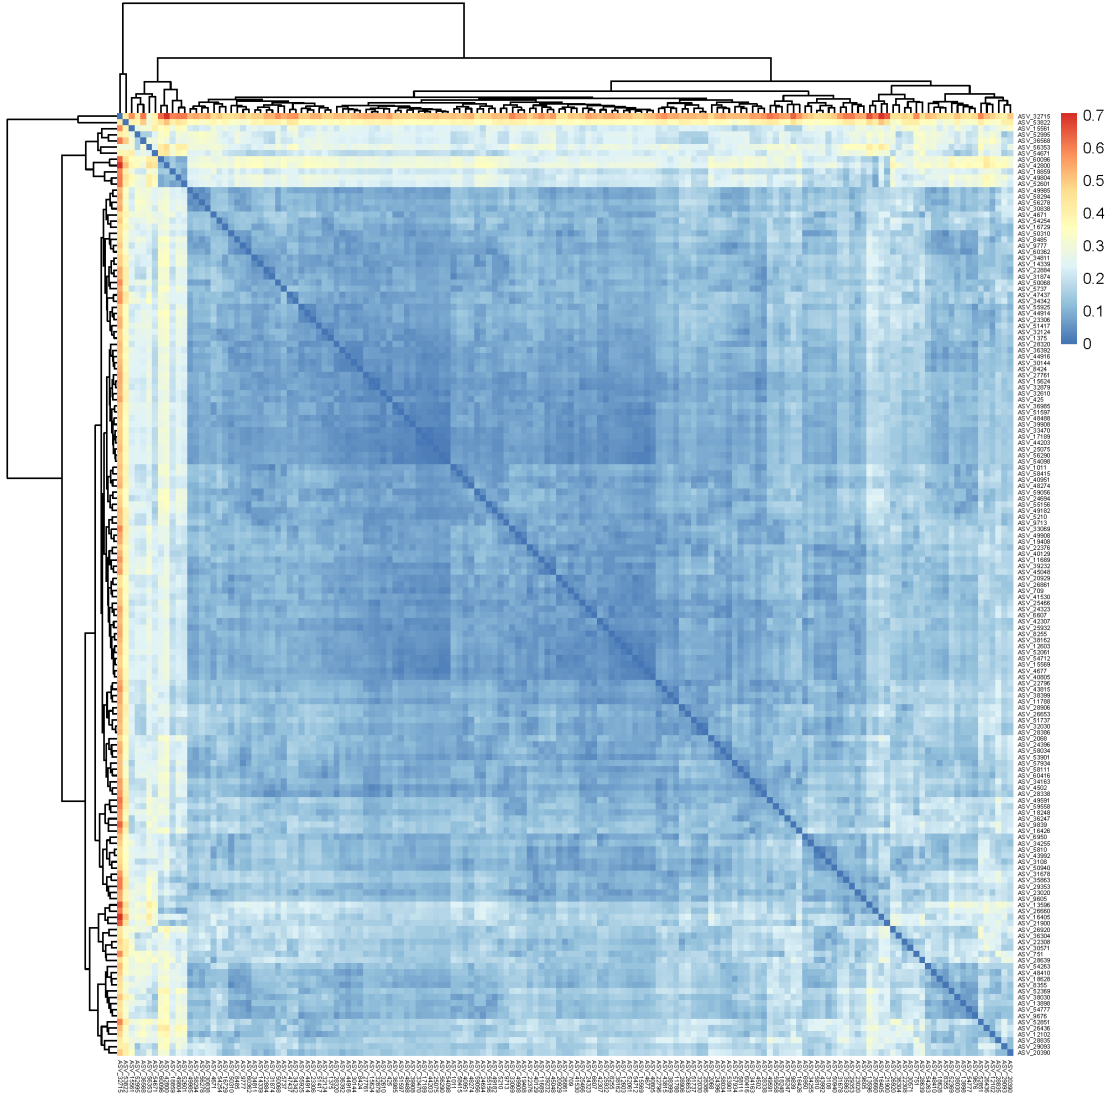

**Figure S4.**

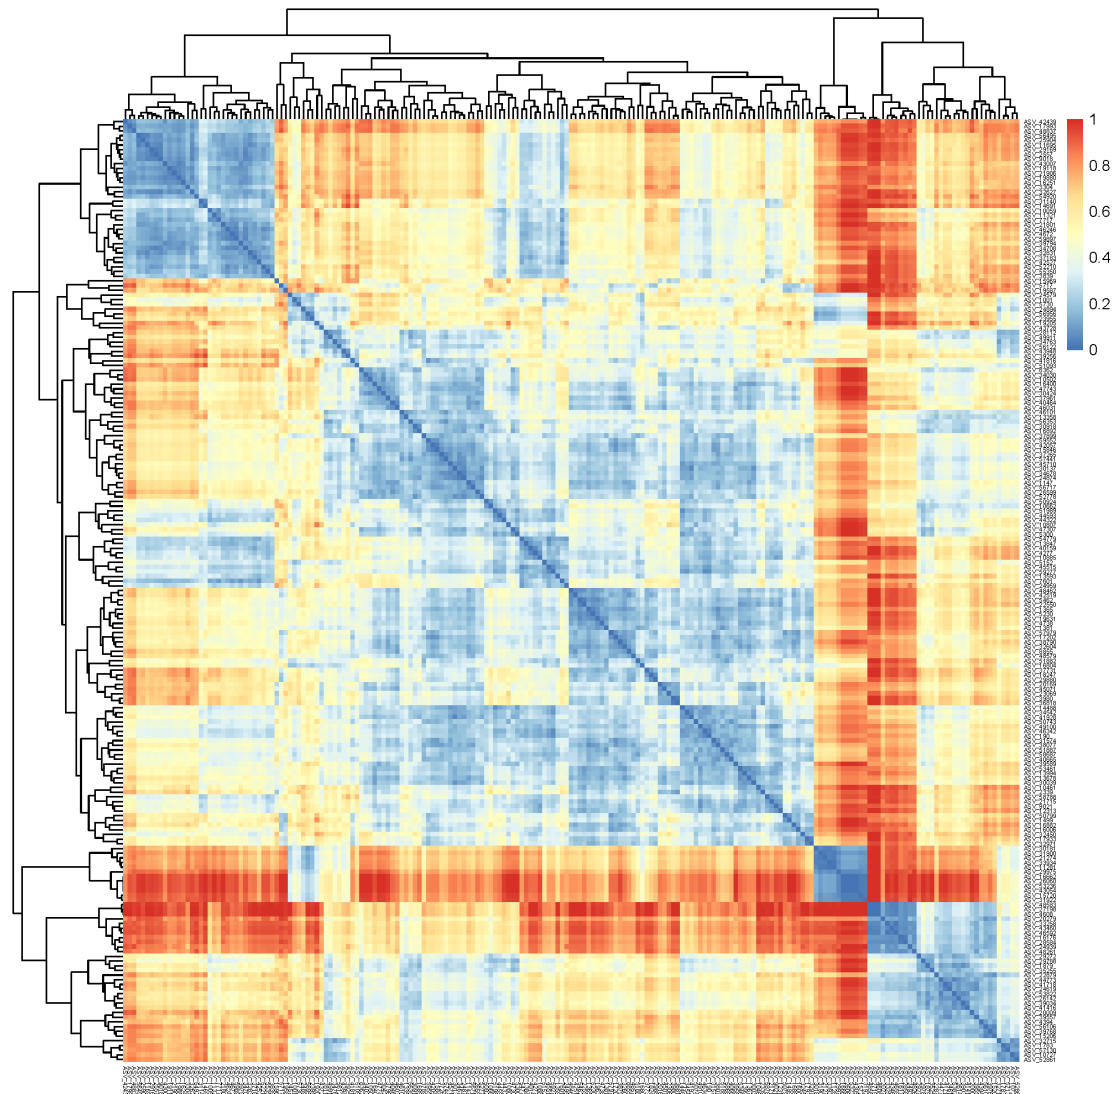

Supplement: s1 [file s1]
